# 1 **Allele-specific genome editing using CRISPR-Cas9 causes off-** 2 **target mutations in diploid yeast**

3 Arthur R. Gorter de Vries, Lucas G. F. Couwenberg, Marcel van den Broek, Pilar de la Torre Cortés,  
4 Jolanda ter Horst, Jack T. Pronk and Jean-Marc G. Daran\*

5 Department of Biotechnology, Delft University of Technology, Delft, 2629HZ, The Netherlands

6 \* To whom correspondence should be addressed. Tel: 0031152782412; Email: [J.G.Daran@tudelft.nl](mailto:J.G.Daran@tudelft.nl)

## 7 **ABSTRACT**

8 Targeted DNA double-strand breaks (DSBs) with CRISPR-Cas9 have revolutionized genetic  
9 modification by enabling efficient genome editing in a broad range of eukaryotic systems. Accurate  
10 gene editing is possible with near-perfect efficiency in haploid or (predominantly) homozygous  
11 genomes. However, genomes exhibiting polyploidy and/or high degrees of heterozygosity are less  
12 amenable to genetic modification. Here, we report an up to 99-fold lower gene editing efficiency when  
13 editing individual heterozygous loci in the yeast genome. Moreover, Cas9-mediated introduction of a  
14 DSB resulted in large scale loss of heterozygosity affecting DNA regions up to 360 kb that resulted in  
15 introduction of nearly 1700 off-target mutations, due to replacement of sequences on the targeted  
16 chromosome by corresponding sequences from its non-targeted homolog. The observed patterns of  
17 loss of heterozygosity were consistent with homology directed repair. The extent and frequency of  
18 loss of heterozygosity represent a novel mutagenic side-effect of Cas9-mediated genome editing,  
19 which would have to be taken into account in eukaryotic gene editing. In addition to contributing to the  
20 limited genetic amenability of heterozygous yeasts, Cas9-mediated loss of heterozygosity could be  
21 particularly deleterious for human gene therapy, as loss of heterozygous functional copies of anti-  
22 proliferative and pro-apoptotic genes is a known path to cancer.

## 23 **INTRODUCTION**

24 CRISPR-Cas9-assisted genome editing requires the simultaneous presence of the Cas9  
25 endonuclease and a guide-RNA (gRNA) that confers target-sequence specificity (1). A gRNA consists  
26 of a structural domain and a variable sequence homologous to the targeted sequence (1-4). A Cas9-  
27 gRNA complex introduces a DSB when the gRNA binds to its reverse complement sequence on the  
28 5' side of a PAM sequence (NGG). Imperfect gRNA complementarity and/or absence of a PAM  
29 sequence strongly reduce editing efficiencies (5). CRISPR-Cas9 enables specific editing of any  
30 sequence proximal to a PAM sequence, with minimal off-targeting effects (5). The introduction of a  
31 DSB facilitates genome editing by increasing the rate of repair by homologous recombination (6).  
32 When a repair fragment consisting of a DNA oligomer with homology to regions on both sides of the  
33 introduced DSB is added, it is integrated at the targeted locus by homologous recombination,  
34 resulting in replacement of the original sequence and repair of the DSB (2-4). In *S. cerevisiae*, double  
35 stranded DNA oligomers with 60 bp of homology are sufficient to obtain accurate gene-editing in  
36 almost 100% of transformed cells (3). By inserting sequences between the homologous regions of the

37 repair oligonucleotide, heterozygous sequences of up to 35 Kbp could be inserted at targeted loci (7).  
38 While such gene editing approaches have been very efficient in haploid and homozygous diploid  
39 yeasts, the accurate introduction of short DNA fragments can be tedious in heterozygous yeast. In  
40 homozygous diploid and polyploid eukaryotes, CRISPR-Cas9 introduces DSBs in all alleles of a  
41 targeted sequence (8). In heterozygous genomes, gRNAs can be designed for allele-specific targeting  
42 if heterozygous loci have different PAM motifs and/or different 5' sequences close to a PAM motif  
43 (8,9), enabling allele-specific gene editing using Cas9. In such cases, a DSB is introduced in only one  
44 of the homologous chromosomes while the other homolog remains intact. However, the presence of  
45 intact homologous chromosomes facilitates repair of DSBs by homologous recombination (HR),  
46 homology-directed repair (HDR) or break-induced repair (BIR) in eukaryotes (10-12). Therefore, the  
47 presence of an intact homologous chromosome could provide an alternative path of DSB repair and,  
48 thereby, compete with the intended gene-editing event. So far, no systematic analysis has been  
49 performed of the efficiency of Cas-9-mediated gene editing at heterozygous loci. To investigate if  
50 Cas9 gene editing works differently in heterozygous diploid yeast, we tested if allele-specific targeting  
51 of heterozygous loci using Cas9 enables accurate gene editing in an interspecies *Saccharomyces*  
52 hybrid, and investigated the resulting transformants. In addition, we systematically investigated the  
53 efficiency of CRISPR-Cas9-mediated genome editing when targeting various homozygous and  
54 heterozygous loci in diploid laboratory *Saccharomyces cerevisiae* strains while monitoring off-target  
55 mutations.

## 56 MATERIAL AND METHODS

### 57 Strains, plasmids, primers and statistical analysis

58 *S. cerevisiae* strains used in this study are derived from the laboratory strains CEN.PK113-7D and  
59 S288C (13,14). Yeast strains, plasmids and oligonucleotide primers used in this study are provided in  
60 Tables S3, S4 and S5. Statistical significance was determined using two-tailed unpaired Student's t-  
61 tests in GraphPad Prism 4.

### 62 Media and growth conditions

63 Plasmids were propagated overnight in *Escherichia coli* XL1-Blue cells in 10 mL LB medium  
64 containing 10 g·L<sup>-1</sup> peptone, 5 g·L<sup>-1</sup> Bacto Yeast extract, 5 g·L<sup>-1</sup> NaCl and 100 mg·L<sup>-1</sup> ampicillin at  
65 37°C. Unless indicated otherwise, yeast strains were grown at 30 °C and 200 RPM in 100 mL shake  
66 flasks containing 50 mL YPD medium, containing 10 g·L<sup>-1</sup> Bacto yeast extract, 20 g·L<sup>-1</sup> Bacto peptone,  
67 and 20 g·L<sup>-1</sup> glucose. Alternatively, strains were grown in synthetic medium (SM) containing 6.6 g·L<sup>-1</sup>  
68 K<sub>2</sub>SO<sub>4</sub>, 3.0 g·L<sup>-1</sup> KH<sub>2</sub>PO<sub>4</sub>, 0.5 g·L<sup>-1</sup> MgSO<sub>4</sub>·7H<sub>2</sub>O, 1 mL·L<sup>-1</sup> trace elements, 1 mL·L<sup>-1</sup> vitamin solution  
69 (15) and 20 g·L<sup>-1</sup> glucose. For uracil auxotrophic strains, SM-derived media were supplemented with  
70 150 mg·L<sup>-1</sup> uracil (16). Solid media were supplemented with 20 g·L<sup>-1</sup> agar. Selection for the amdS  
71 marker was performed on SM-AC: SM medium with 0.6 g·L<sup>-1</sup> acetamide as nitrogen source instead of  
72 (NH<sub>4</sub>)<sub>2</sub>SO<sub>4</sub> (17). The amdS marker was lost by growth on YPD and counter-selected on SM-FAC: SM  
73 supplemented with 2.3 g·L<sup>-1</sup> fluoroacetamide (17). Yeast strains and *E. coli* containing plasmids were  
74 stocked in 1 mL aliquots after addition of 30% v/v glycerol to the cultures and stored at -80 °C.

## 75 **Flow cytometric analysis**

76 Overnight aerobic cultures in 100 mL shake flasks on 20 mL YPD medium were vortexed thoroughly  
77 to disrupt cell aggregates and used for flow cytometry on a BD FACSAria™ II SORP Cell Sorter (BD  
78 Biosciences, Franklin Lakes, NJ, USA) equipped with 355 nm, 445 nm, 488 nm, 561 nm and 640 nm  
79 lasers and a 70 µm nozzle, and operated with filtered FACSFlow™ (BD Biosciences). Cytometer  
80 performance was evaluated prior to each experiment by running a CST cycle with CS&T Beads (BD  
81 Biosciences). Drop delay for sorting was determined by running an Auto Drop Delay cycle with  
82 Accudrop Beads (BD Biosciences). Cell morphology was analysed by plotting forward scatter (FSC)  
83 against side scatter (SSC). The fluorophore mRuby2 was excited by the 561 nm laser and emission  
84 was detected through a 582 nm bandpass filter with a bandwidth of 15 nm. The fluorophore  
85 mTurquoise2 was excited by the 445 nm laser and emission was detected through a 525 nm  
86 bandpass filter with a bandwidth of 50 nm. The fluorophore Venus was excited by the 488 nm laser  
87 and emission was detected through a 545 nm bandpass filter with a bandwidth of 30 nm. For each  
88 sample, 100'000 events were analysed and the same gating strategy was applied to all samples of  
89 the same strain. First, "doublet" events were discarded on a FSC-A/FSC-H plot, resulting in at least  
90 75'000 single cells for each sample. Of the remaining single cells, cells with and cells without  
91 fluorescence from Venus were selected in a FSC-A/Venus plot. For both these groups, cells positive  
92 for mRuby2 and mTurquoise2, cells positive for only mRuby2, cells positive for only mTurquoise2 and  
93 cells negative for mRuby2 and mTurquoise2 were gated. The same gating was used for all samples  
94 of each strain. Sorting regions ("gates") were set on these plots to determine the types of cells to be  
95 sorted. Gated single cells were sorted in 96-well microtiter plates containing YPD using a "single cell"  
96 sorting mask, corresponding to a yield mask of 0, a purity mask of 32 and a phase mask of 16. FACS  
97 data was analysed using FlowJo® software (version 3.05230, FlowJo, LLC, Ashland, OR). Separate  
98 gating strategies were made for IMX1555, IMX1557 and IMX1585 to account for possible differences  
99 in cell size, shape and morphology.

## 100 **Plasmid assembly**

101 Plasmid pUD574 was de novo synthesised at GeneArt (Thermo Fisher Scientific, Waltham, MA)  
102 containing the sequence 5'  
103 GGTCTCGCAAATTACTGATGAGTCCGTGAGGACGAAACGAGTAAGCTCGTCTGTAATATCTT  
104 AATGCTAAAGTTTTAGAGCTAGAAATAGCAAGTTAAAATAAGGCTAGTCCGTTATCAACTTGAAAA  
105 AGTGGCACCGAGTCGGTGGCTTTTGGCCGGCATGGTCCCAGCCTCCTCGCTGGCGCCGGCTGGG  
106 CAACATGCTTCGGCATGGCGAATGGGACACAGCGAGACC 3'.

107 Plasmids pUD429 was constructed in a 10 µL golden gate assembly using T4 ligase (St. Louis, MO,  
108 USA) and BsaI (New England BioLabs, Ipswich, MA) from 10 ng of parts pYTK002, pYTK047,  
109 pYTK067, pYTK079, pYTK081 and pYTK083 of the yeast toolkit as described previously (18).  
110 Similarly, pUD430 was constructed from pYTK003, pYTK047, pYTK068, pYTK079, pYTK081 and  
111 pYTK083, and pUDP431 from pYTK004, pYTK047, pYTK072, pYTK079, pYTK081 and pYTK083.  
112 Plasmid pUDE480 expressing mRuby2 was constructed from GFP dropout plasmid pUD429 with  
113 pYTK011, pYTK034 and pYTK054 using golden gate assembly as described previously (18). Similarly,

114 pUDE481 expressing mTurquoise2 was constructed from pUD430, pYTK009, pYTK032 and  
115 pYTK053, and pUDE482 expressing Venus from pUD431, pYTK013, pYTK033 and pYTK055.  
116 Plasmids pUDR323, pUDR324, pUDR325, pUDR358, pUDR359, pUDR360, pUDR361 and pUDR362,  
117 expressing gRNAs targeting *SIT1*, *FAU1*, *Cas9*, *UTR2*, *FIR1*, *AIM9*, *YCK3* and intergenic region 550K  
118 respectively, were constructed using NEBuilder® HiFi DNA Assembly Master Mix by assembling the 2  
119  $\mu$ m fragment amplified from pROS11 with primers 12230, 12235, 9457, 12805, 12806, 12807, 12808,  
120 12809 respectively, and the plasmid backbone amplified from pROS11 with primer 6005 as described  
121 previously (3).  
122 Plasmid pUDP045, expressing gRNA<sub>MAL11</sub> and *cas9*, was constructed in a one-pot reaction by  
123 digesting pUDP004 and pUD574 using *BsaI* and ligating with T4 ligase. Correct assembly was  
124 verified by restriction analysis using *Pdml*.

### 125 **Strain construction**

126 Yeast strains were transformed according to the high-efficiency protocol by Gietz *et al* (19). IMX1544  
127 was constructed by transforming IMX581 with 1  $\mu$ g pUDR323 and 1  $\mu$ g of a repair fragment amplified  
128 from pUD481 using primers 12233 and 12234 containing an expression cassette for mTurquoise2  
129 and 60 bp homology arms with the *FAU1* locus. IMX1555 was constructed by transforming IMX1544  
130 with 1  $\mu$ g pUDR324 and 1  $\mu$ g of repair fragment amplified from pUD480 using primers 12228 and  
131 12229 containing an expression cassette for mRuby2 and 60 bp homology arms with the *SIT1* locus.  
132 Transformants were selected on SM-AC plates, three single colony isolates were grown overnight on  
133 YPD and streaked on SM-FAC plates. Genomic DNA of a single colony was extracted, insertion of  
134 mTurquoise2 in *FAU1* was confirmed by PCR using primers 12236 and 12237, and insertion of  
135 mRuby2 in *SIT1* was confirmed by PCR using primers 12231 and 12232 followed by digestion with  
136 *PvuII* and *XhoI* digestion. IMX1557 was constructed by adding 10  $\mu$ L of stationary phase culture of  
137 IMX1555 and of IMK439 in 1 mL of SM medium, incubating overnight at 30 °C and plating on SM  
138 plates with 10 g·L<sup>-1</sup> clonNAT and 100 g·L<sup>-1</sup> G418. IMX1585 was constructed by adding 10  $\mu$ L of  
139 stationary phase culture of IMX1555 and of S288C in 1 mL of SM medium, incubating overnight at 30  
140 °C and plating on SM plates with 10 g·L<sup>-1</sup> clonNAT without added uracil. All constructed strains were  
141 grown overnight in YPD and fluorescence corresponding to mRuby2 and mTurquoise2 was verified by  
142 flow cytometry.

### 143 **Cas9 mediated targeting in *S. cerevisiae* x *eubayanus* hybrid IMS0408**

144 IMX1421, IMX1422, IMX1423 and IMX1424 were constructed by transforming IMS0408 with 1  $\mu$ g  
145 pUDP045 and 1  $\mu$ g of a 120 bp repair fragment constructed by annealing primers 10813 and 10814  
146 as described previously (8). Transformants were selected on SM-AC plates, genomic DNA of 10  
147 single colonies was extracted, but no band could be obtained when amplifying the *MAL11* locus using  
148 primer sets 1084/1470 and 1657/1148. The exact same procedure was performed without the  
149 addition of the 120 bp repair fragment. Four randomly selected colonies transformed with repair  
150 fragment were re-streaked three times on YPD agar, the plasmid was counter-selected for by plating  
151 on SM-FAC and the isolates were stocked as IMX1421, IMX1422, IMX1423 and IMX1424.

## 152 **Cas9 mediated introduction of DSBs in *S. cerevisiae* strains**

153 DSBs were introduced by transforming yeast strains using 1 µg of purified gRNA expression plasmid  
154 and 1 µg of gel-purified double stranded repair fragment. The expression of gRNAs was done with  
155 plasmids pMEL11 to target *CAN1*, pUDR325 to target *cas9*, pUDR358 to target *UTR2*, pUDR359 to  
156 target *FIR1*, pUDR360 to target *AIM9*, pUDR361 to target *YCK3* and pUDR362 to target 550K  
157 according to Mans *et al* (3). Repair fragments containing Venus expression cassettes were PCR  
158 amplified from plasmid pUDE482 with primers with an overlap of about 20 bp with the nucleotides  
159 flanking the targeted open reading frame and purified on a 1% agarose gel (Table S5). Upon  
160 transformation, the cells were transferred to 100 mL shake flasks containing 20 mL SM-AC medium  
161 and grown until stationary phase at 30°C and 200 RPM to select cells transformed with the gRNA  
162 expression plasmid. After about 72h, 0.2 mL of these cultures was transferred to fresh SM-AC and  
163 grown under the same conditions to stationary phase to dilute any remaining untransformed cells.  
164 After about 48h, 0.2 mL of these cultures was transferred to 100 mL shake flasks containing 20 mL  
165 YPD medium and grown for about 12h under the same conditions to obtain optimal fluorescence  
166 signals.

## 167 **DNA extraction and whole genome analysis**

168 IMX1557, IMX1585, IMX1596-IMX1635, IMS0408 and IMX1421-IMX1424 were incubated in 500 mL  
169 shake flasks containing 100 mL liquid YPD medium at 30 °C on an orbital shaker set at 200 RPM until  
170 the strains reached stationary phase with an OD<sub>660</sub> between 12 and 20. Genomic DNA was isolated  
171 using the Qiagen 100/G kit (Qiagen, Hilden, Germany) according to the manufacturer's instructions  
172 and quantified using a Qubit® Fluorometer 2.0 (ThermoFisher Scientific). Between 11.5 and 54.6 µg  
173 genomic DNA was sequenced by Novogene Bioinformatics Technology Co., Ltd (Yuen Long, Hong  
174 Kong) on a HiSeq 2500 (Illumina, San Diego, CA) with 150 bp paired-end reads using TruSeq PCR-  
175 free library preparation (Illumina). For IMX1557, IMX1585 and IMX1596-IMX1635, reads were  
176 mapped onto the *S. cerevisiae* CEN.PK113-7D genome (13) using the Burrows–Wheeler Alignment  
177 tool (BWA) and further processed using SAMtools and Pilon for variant calling (20-22). Homozygous  
178 SNPs from IMX1585 were subtracted from the list of homozygous SNPs of each strain and a list of  
179 homozygous SNPs on chromosome V was compiled per strain. Based on the list of heterozygous  
180 SNPs in IMX1585, all homozygous SNPs corresponded to the nucleotide from S288C while the  
181 nucleotide from IMX1557 was lost, and regions were identified in which all contiguous heterozygous  
182 SNPs lost heterozygosity for each strain. LOH was confirmed by visualising the generated .bam files  
183 in the Integrative Genomics Viewer (IGV) software (23). Regions mapped as having lost  
184 heterozygosity correspond to regions between the first and last nucleotide which lost heterozygosity.  
185 For IMS0408 and IMX1421-IMX1424, reads were aligned to a reference genome obtained by  
186 combining the reference genome of CEN.PK113-7D (13) and the reference genome of *S. eubayanus*  
187 strain CBS12357 (24) as they are closely related to the haploid parents of IMS0408. Regions affected  
188 by loss of heterozygosity were defined as regions in which reads did not align to the *S. cerevisiae*  
189 reference chromosome VII while reads aligned to the corresponding region of the *S. eubayanus*  
190 reference chromosome VII with approximately double the normal coverage.

## 192 RESULTS

### 193 Targeting of a heterozygous gene in a *S. cerevisiae* x *eubayanus* hybrid

194 To investigate Cas9 gene editing in a genetic context with extensive heterozygosity, we targeted a  
195 heterozygous locus in an interspecific *S. cerevisiae* x *eubayanus* hybrid. The hybrid IMS0408 was  
196 constructed previously by mating a haploid *S. cerevisiae* laboratory strain and a haploid spore from  
197 the *S. eubayanus* type strain CBS 12357, resulting in an allodiploid strain with approximately 85%  
198 nucleotide identity between corresponding chromosomes of the two subgenomes (25). The *MAL11*  
199 gene encodes a membrane transporter located on chromosome VII in *S. cerevisiae*, which is absent  
200 in *S. eubayanus* CBS 12357 genome. Therefore, the *S. cerevisiae* chromosome VII could be  
201 specifically targeted using Cas9 and a gRNA targeting *MAL11*. IMS0408 was transformed with  
202 plasmid pUDP045, expressing Cas9 and a gRNA targeting *MAL11*, with and without a repair fragment  
203 with 60-bp of homology to sequences adjacent to the 5' and 3' ends of the coding region of *MAL11*.  
204 Normally, selection for the presence of the Cas9/gRNA expression plasmid is sufficient to obtain  
205 accurate gene editing in almost 100% of transformed cells without the need of a selection marker  
206 incorporated in the repair fragment in *Saccharomyces* yeast (3,8). In common laboratory strains,  
207 replacement of a sequence with a repair DNA is commonly detected by diagnostic PCR. However, in  
208 the hybrid strain IMS0408, multiple attempts failed to yield the expected fragments after  
209 transformation with the gRNA targeting *MAL11* and a repair fragment. Therefore, the genomes of four  
210 random transformants, named IMX1421 to IMX1424, were sequenced using 150 bp paired-end  
211 Illumina reads and aligned to a haploid *S. cerevisiae* x *S. eubayanus* reference genome. While reads  
212 of strain IMS0408 aligned unambiguously to the *MAL11* locus on chromosome VII of the *S. cerevisiae*  
213 sub-genome, *MAL11* DNA was absent in transformants IMX1421-IMX1424. Absence of *MAL11* was  
214 associated with loss of large regions of chromosome VII, ranging from 29 to 356 kbp (Fig. 1).  
215 Concomitantly, the corresponding regions on the *S. eubayanus* chromosome VII devoid of *MAL11*  
216 orthologue showed double sequence coverage, indicating that targeting of *MAL11* using Cas9  
217 resulted in replacement of varying regions of the targeted chromosome by corresponding regions  
218 from the homeologous chromosome (Fig. S1). These results indicated that genome editing using  
219 Cas9 caused loss of heterozygosity rather than the intended gene editing when targeting a locus  
220 present on just one of two homologous chromosomes in a heterozygous yeast.

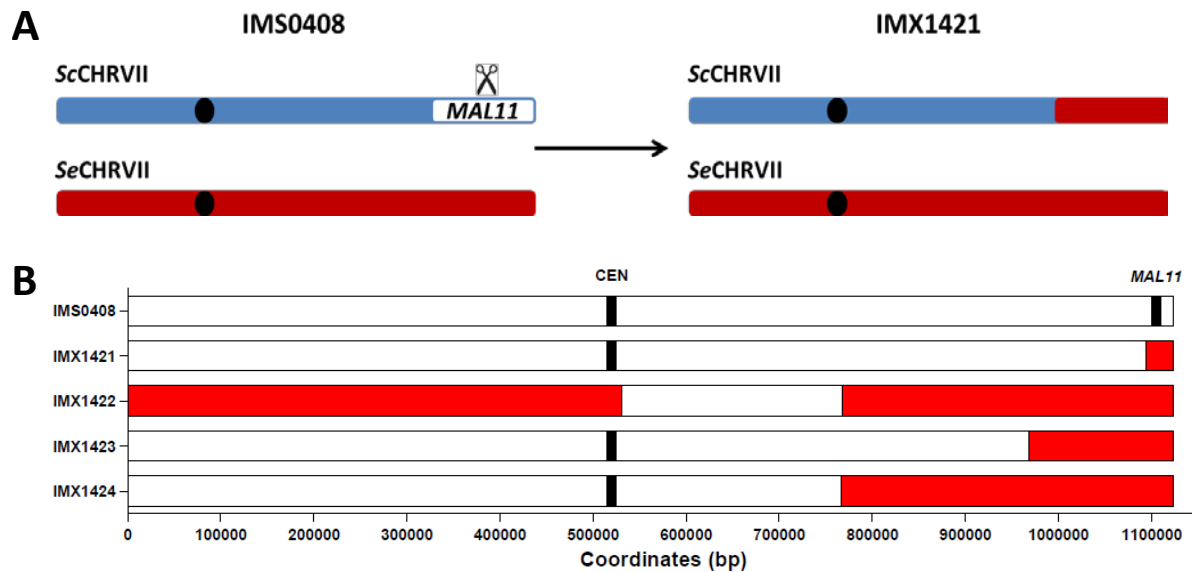

221

222 **Figure 1. Loss of heterozygosity observed by whole genome sequencing upon Cas9-targeting**  
223 **of *MAL11* on the *Saccharomyces cerevisiae* derived chromosome VII in the *S. cerevisiae* x**  
224 ***eubayanus* hybrid IMS0408.** IMS0408 was transformed with a 120 bp repair fragment with 60 bp  
225 flanks corresponding to the sequence before and after *MAL11* and with plasmid pUDP045 expressing  
226 Cas9 and a gRNA targeting the *S. cerevisiae* specific gene *MAL11* gene. Upon plating on selective  
227 medium, four randomly picked colonies were selected and sequenced using 150 bp pair-end reads  
228 and mapped against a reference genome composed of chromosome level assemblies of *S.*  
229 *cerevisiae* and of *S. eubayanus*. The centromere and targeted gene *MAL11* are shown at their exact  
230 coordinates, but their size is not at scale. Loss of heterozygosity is shown in red and was defined as  
231 regions in which reads did not align to the *S. cerevisiae* reference chromosome VII while reads  
232 aligned to the corresponding region on the *S. eubayanus* reference chromosome VII with  
233 approximately double the normal coverage.

#### 234 Targeting of heterozygous loci in a mostly homozygous diploid *S. cerevisiae* strain

235 To investigate if the observed lack of efficient gene editing was specific to this highly heterozygous *S.*  
236 *cerevisiae* x *eubayanus* hybrid, we systematically investigated the impact of target-sequence  
237 heterozygosity on the efficiency of gene editing in *S. cerevisiae* strains. To this end, DSBs were  
238 introduced at homozygous and heterozygous loci on chromosome V of yeast strains that carried a  
239 Cas9 expression cassette integrated at the *CAN1* locus. Plasmid-based gRNA expression was  
240 performed as described previously (3). Use of a repair fragment expressing the fluorescent protein  
241 Venus enabled analysis of editing efficiency by flow cytometry (18). To verify functional Cas9 and  
242 gRNA expression, the  $\Delta can1::cas9$  locus was first targeted in the haploid *S. cerevisiae* strain  
243 IMX1555, resulting in integration of the repair fragment in  $98.3 \pm 1.3\%$  of cells (Table S1).  
244 Subsequently, the homozygous alleles of *AIM9* and *YCK3* were targeted in the congenic diploid *S.*  
245 *cerevisiae* strain IMX1557, resulting in integration of the repair fragment in  $98.6 \pm 0.8\%$  and  $99.2 \pm 0.4\%$   
246 of cells, respectively (Fig. 2A). In contrast, when individually editing each allele of the heterozygous

247 *CAN1/Δcan1::cas9* locus in the diploid strain IMX1557, the repair fragment was integrated in only  
248 4.4±2.5% of cells when targeting the *Δcan1::cas9* allele, and 0.9±0.6% of the cells when targeting the  
249 *CAN1* allele (Fig. 2A). These results indicated that gene editing efficiencies were up to 99-fold lower  
250 for heterozygous target loci than for homozygous target loci ( $p < 10^{-4}$ ). Since IMX1557 was  
251 homozygous in most of its genome, except the targeted locus, the introduction of a DSB in only one of  
252 two homologous chromosomes rather than genome heterozygosity itself, impeded accurate and  
253 efficient gene editing using Cas9.

254 In order to investigate if Cas9 gene editing resulted in loss of heterozygosity, as observed in the  
255 hybrid IMS0408, the presence of both chromosome arms of the targeted chromosome homolog was  
256 monitored by flow cytometry. IMX1557 expressed the fluorophores mRuby2 and mTurquoise2 from  
257 the *SIT1* and *FAU1* loci of the chromosome V copy harbouring the *Δcan1::cas9* allele, but not from  
258 the non-modified homologous chromosome (Fig. B1-D1). Loss of the left and right arms of the copy of  
259 chromosome V harbouring *Δcan1::cas9* could therefore be monitored by measuring fluorescence  
260 corresponding to respectively mRuby2 and mTurquoise2 (18). After expressing a gRNA targeting the  
261 *cas9* cassette, 99.4±0.3% of cells still expressed mTurquoise2. However, while 99.5±0.7% of the  
262 correctly gene-edited cells still expressed mRuby2, 47.6±2.7% of the Cas9-targeted cells that did not  
263 integrate the repair fragment had lost mRuby2 fluorescence (Fig. 2A). These results indicated that  
264 targeting of a heterozygous locus resulted in loss of sequences on the targeted chromosome arm, but  
265 did not affect the opposite chromosome arm. Similarly, after targeting the *CAN1* allele of the same  
266 locus, two distinct subpopulations were discernible in cells that had not integrated the repair fragment  
267 (Fig. 2D). The two-fold difference in mRuby2 fluorescence between these two subpopulations could  
268 reflect duplication of mRuby2. Loss of mRuby2 fluorescence upon transformation with a gRNA  
269 targeting *Δcan1::cas9* and doubling of mRuby2 fluorescence when targeting *CAN1* were also  
270 observed in the absence of a co-transformed repair fragment (Table S1). This indicates that  
271 introduction of a DSB at a heterozygous locus caused loss of heterozygosity (LOH) through  
272 replacement of a targeted chromosome segment by duplication of the corresponding segment from its  
273 homologous chromosome, as was observed when targeting *MAL11* in the *S. cerevisiae* x *eubayanus*  
274 hybrid IMS0408.



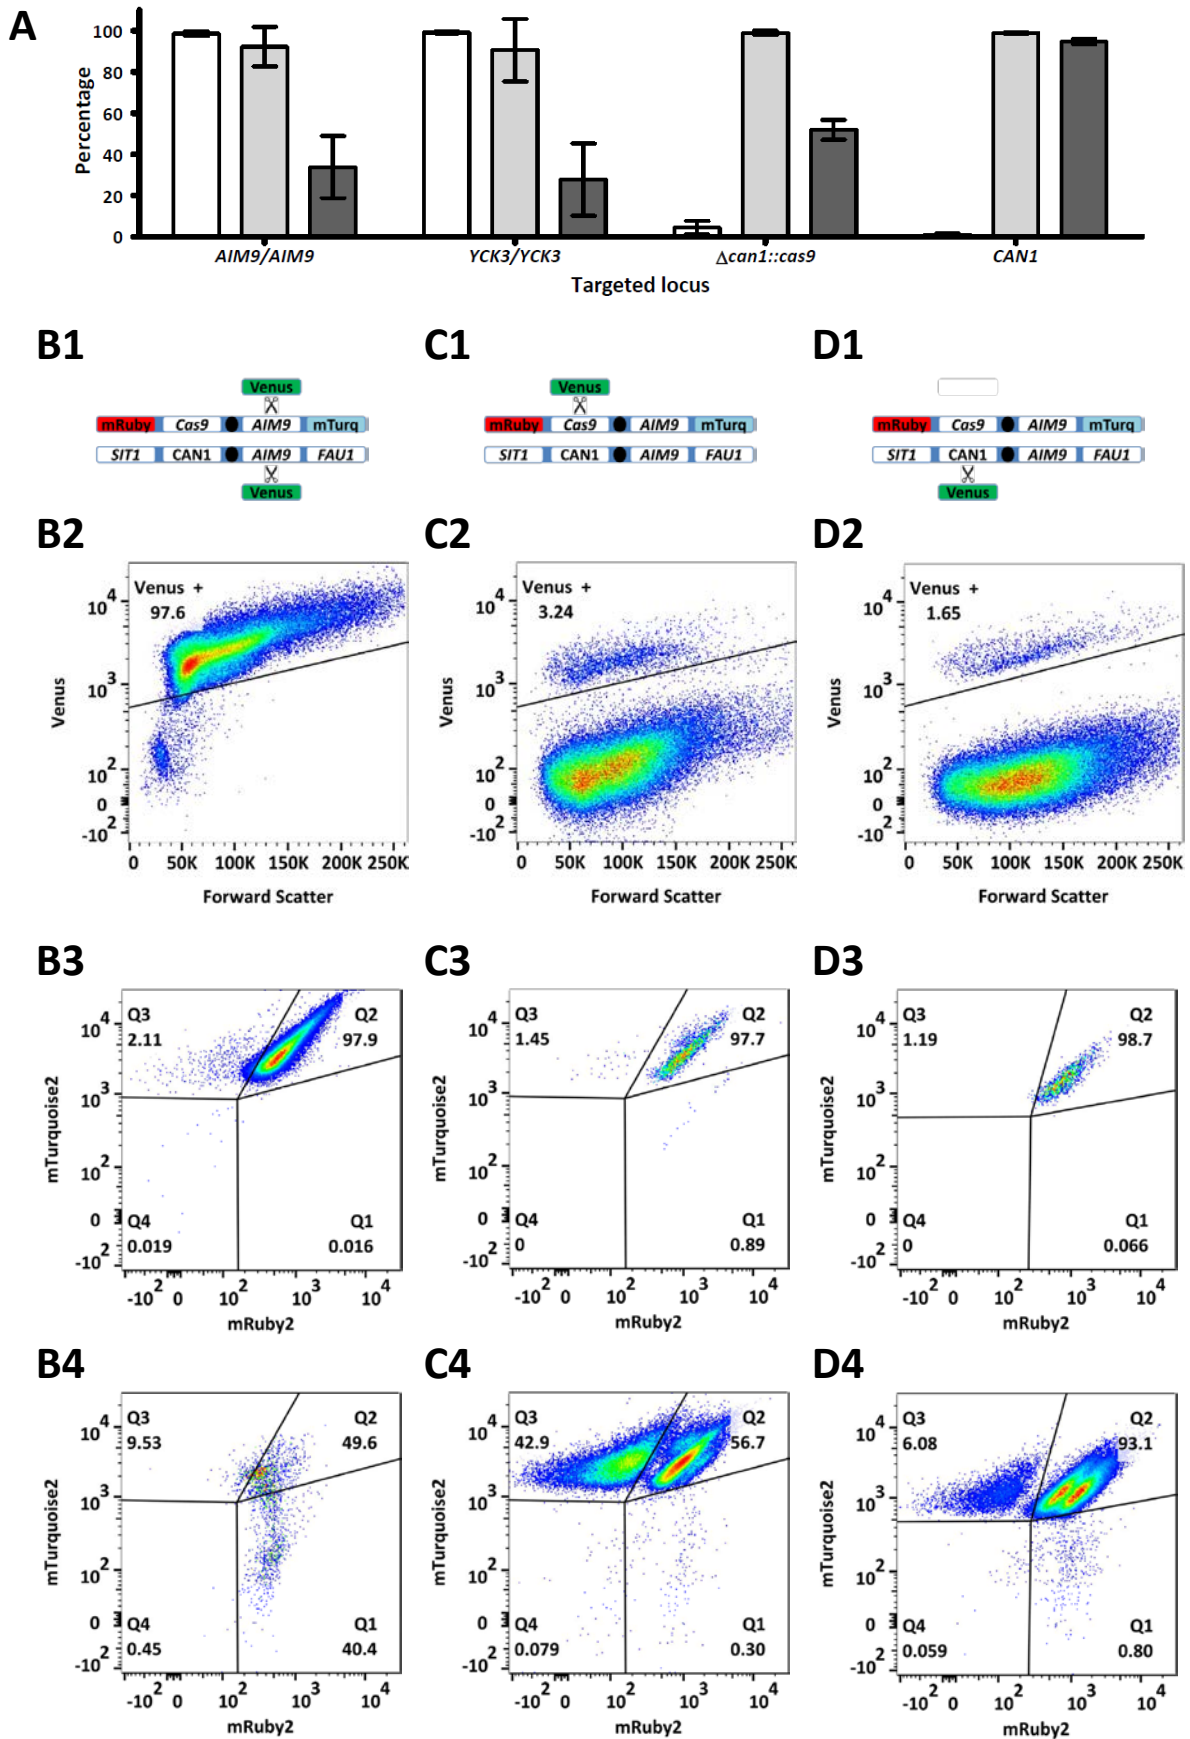

276 **Figure 2. Cas9-mediated gene editing of homozygous and heterozygous loci on chromosome**  
277 **V of *S. cerevisiae*. (A) Average fluorescence of cell populations in which the homozygous *AIM9***  
278 **and *YCK3* alleles and the heterozygous *Cas9* and *CAN1* alleles were targeted in the diploid**  
279 **strain *IMX1557*. The percentage of cells expressing Venus (white), the percentages of cells**  
280 **expressing both mTurquoise2 and mRuby2 in the Venus positive (light grey) and Venus negative cells**  
281 **(dark grey) are shown. For each target, averages and standard deviation for biological triplicates are**  
282 **shown. (B,C and D) Fluorescence profiles obtained when targeting *AIM9*, *Cas9* and *CAN1* in**  
283 ***IMX1557*. (row 1) Schematic representation of both copies of chromosome V in *IMX1557*, with the**  
284 **alleles at the *SIT1*, *CAN1*, *AIM9* and *FAU1* loci and scissors indicating Cas9 targeting. While one**  
285 **chromosome copy has the wildtype alleles for all loci, the other copy has mRuby2 integrated in *SIT1*,**  
286 **Cas9 integrated in *CAN1* and mTurquoise2 integrated in *FAU1*. (rows 2, 3 and 4) Flow cytometry**  
287 **profiles of targeted cells. Each gene was targeted in three biological replicates and flow cytometric**  
288 **data for a representative replicate is shown. After transformation, 100,000 cells were analysed by flow**  
289 **cytometry and single cells were selected based on a FSC-A/FSC-H plot to avoid multicellular**  
290 **aggregates. For each replicate, at least 75,000 single cells remained and the fluorescence**  
291 **corresponding to Venus was used to determine gene-editing efficiency (row 2). For each gene, the**  
292 **fluorescence corresponding to mRuby2 and mTurquoise2 is plotted for the cells with (row 3) and**  
293 **without (row 4) expression of Venus. Fluorescence results for all samples are provided in Table S1.**

#### 294 **Elucidation of mutations caused by Cas9-targeting using whole genome sequencing**

295 Chromosome-arm LOH has previously been reported upon introduction of a DSB in one of two  
296 homologous chromosomes, but was considered rare and has not been described as disruptive to  
297 gene-editing approaches (9,26,27). To investigate the extent and nature of the LOH caused by Cas9-  
298 editing of heterozygous loci, a strain with approximately four heterozygous SNPs or INDELS per kbp  
299 was generated by mating *IMX1555* (CEN.PK genetic background, expressing Cas9, mRuby2 and  
300 mTurquoise2 from chromosome V) with *S288C* (Table S6). LOH could be monitored at the  
301 chromosome arm level by flow cytometry and at the nucleotide level by whole-genome sequencing.  
302 By using PAM sequences absent in *S288C*, we specifically targeted the CEN.PK-derived  
303 chromosome V, which carried expression cassettes for mRuby2 and mTurquoise2 on its left and right  
304 arms, respectively, at the *CAN1*, *UTR2*, *FIR1*, *AIM9* and *YCK3* loci and at intergenic coordinate  
305 549603, referred to as 550K. Upon targeting of the *CAN1* and *UTR2* loci, mRuby2 fluorescence was  
306 lost in  $46.7 \pm 2.4$  and  $11.2 \pm 0.2\%$  of cells, respectively, while mTurquoise2 fluorescence was unaffected  
307 in at least  $99.6 \pm 0.2\%$  of the cells (Fig. 3A). Targeting of the *FIR1*, *AIM9*, *YCK3* or 550K loci caused  
308 loss of mTurquoise2 fluorescence in  $12.2 \pm 0.4$ ,  $13.6 \pm 0.1$ ,  $12.7 \pm 0.2$  and  $43.6 \pm 0.3\%$  of cells,  
309 respectively, while mRuby2 fluorescence was conserved in at least  $98.1 \pm 0.5\%$  of cells (Fig. 3A). As  
310 the centromere is located between *UTR2* and *FIR1*, these results confirm that, for all investigated loci,  
311 a large fraction of cells lost the targeted chromosome arm. Fluorescence-assisted cell sorting (FACS)  
312 was subsequently used to isolate 10 single cells each from the following populations: *UTR2*-targeted  
313 cells with mRuby2 fluorescence (*IMX1606-IMX1615*), *UTR2*-targeted cells without mRuby2

314 fluorescence (IMX1596-IMX1605), *FIR1*-targeted cells with mTurquoise2 fluorescence (IMX1626-  
315 IMX1635), and *FIR1*-targeted cells without mTurquoise2 fluorescence (IMX1616-IMX1625). Whole-  
316 genome sequencing and alignment of reads to the CEN.PK113-7D genome sequence (13) revealed  
317 LOH of the targeted locus in all 40 isolates (Fig. 3B). In cell lines that did not lose a fluorophore, LOH  
318 was local, affecting regions ranging from 3 to 17,495 nucleotides for *UTR2*-targeted cells and regions  
319 ranging from 1 to 11,900 nucleotides for *FIR1*-targeted cells, corresponding to up to 79 mutations (Fig.  
320 3C and Table S2). In isolates that did lose a fluorophore, LOH affected the chromosome arm  
321 harbouring the targeted locus, affecting 79,859 to 110,289 nucleotides for *UTR2*-targeted cells and  
322 359,841 to 362,790 nucleotides for *FIR1*-targeted cells, corresponding to up to 1,697 mutations (Fig.  
323 3C and Table S2). Absence of newly introduced SNPs at targeted loci indicated that repair of DSBs  
324 did not involve non-homologous end joining (28).

**A**

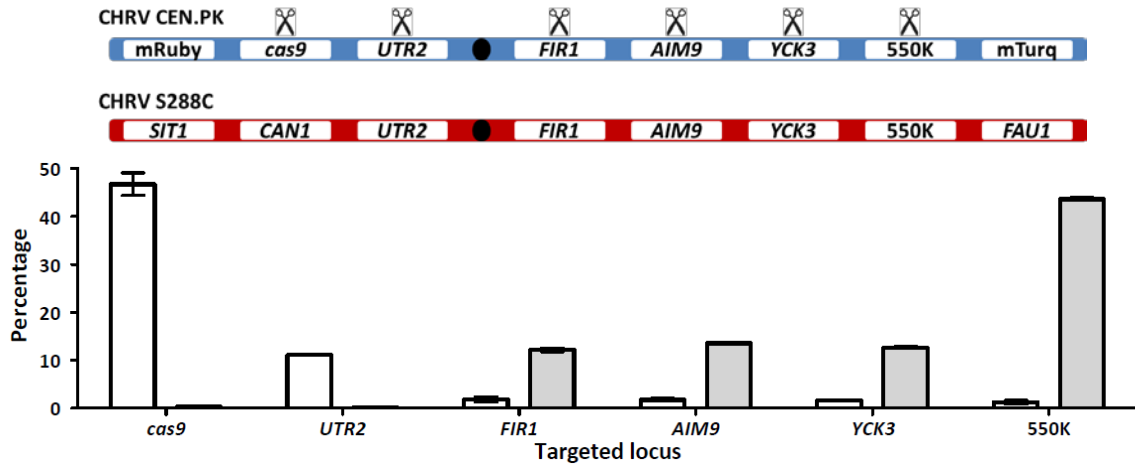

**B**

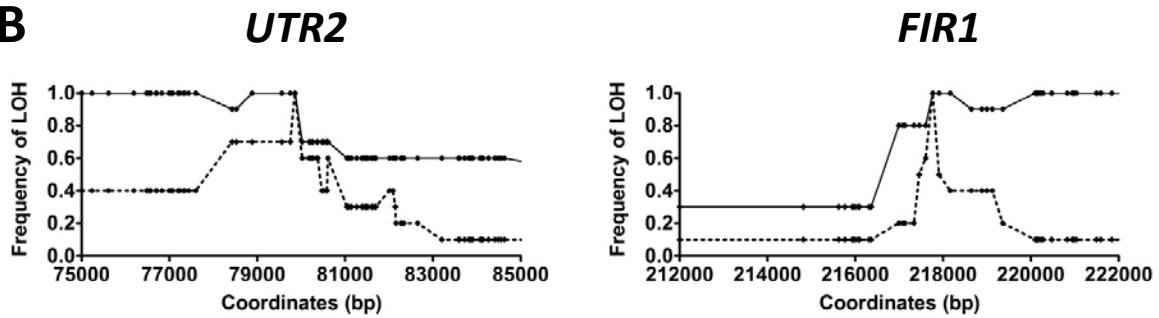

**C**

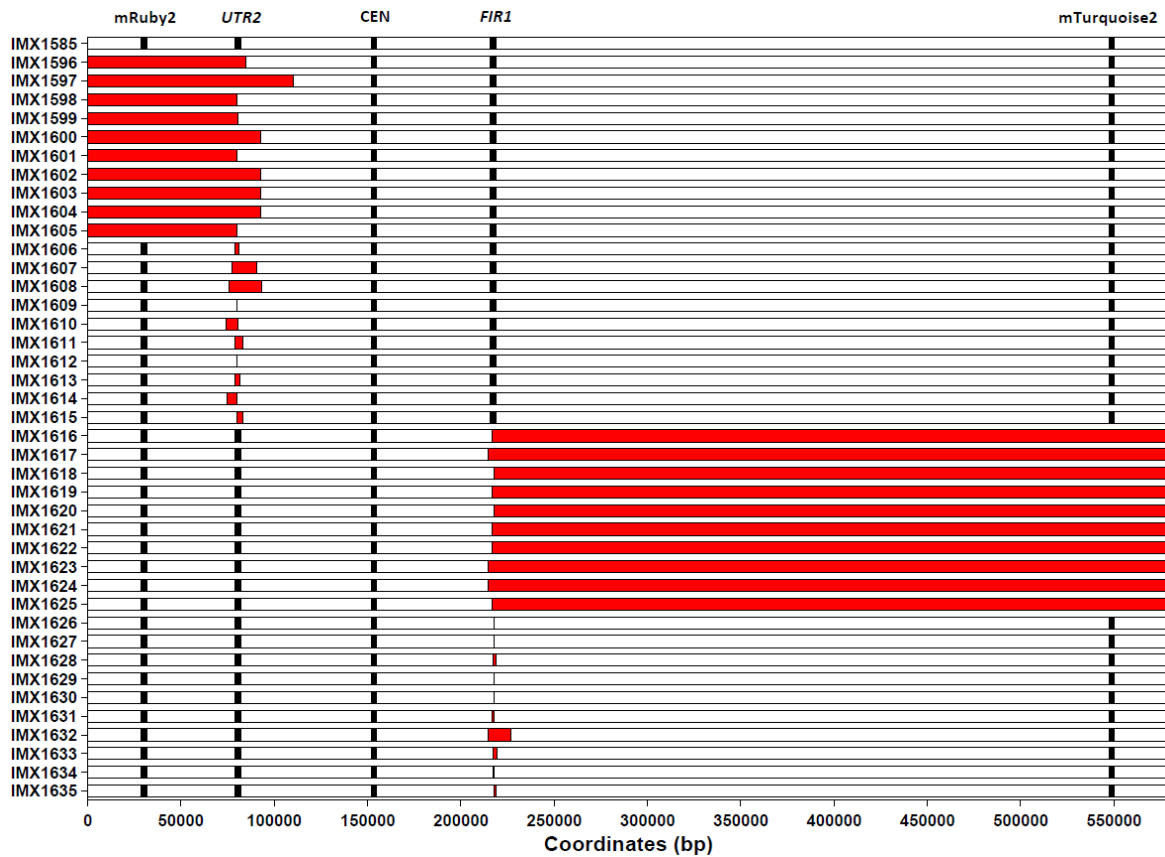

326 **Figure 3 Loss of heterozygosity caused by Cas9-mediated gene editing at heterozygous loci in**  
327 **the heterozygous *S. cerevisiae* diploid IMX1585.** Mating of the haploid *S. cerevisiae* strains  
328 IMX1555 (CEN.PK-derived) and S288C yielded the heterozygous diploid strain IMX1585 (ca. 4  
329 heterozygous nucleotides per kbp on chromosome V). The CEN.PK-derived chromosome harbours  
330 the fluorophores mRuby2 and mTurquoise2, enabling detection of the loss of each arm of the  
331 CEN.PK-derived chromosome V by flow cytometry. DSBs were introduced specifically in the  
332 CEN.PK-derived chromosome and loss of heterozygosity was monitored at the population level using  
333 flow cytometry and in single cell isolates by whole genome sequencing. **(A) Population-level loss of**  
334 **heterozygosity after targeting *cas9*, *UTR2*, *FIR1*, *AIM9* *YCK3* and *550K* in IMX1585.** In a  
335 schematic representation of the CEN.PK-derived and S288C-derived chromosome V, targeted loci  
336 are indicated by scissors, the fluorophores cassettes by their respective fluorescent colour and the  
337 centromere by a black oval. In the graph, the percentage of cells having lost mRuby2 fluorescence  
338 (white) and mTurquoise2 (red) is shown for each targeted locus. Averages and standard deviations  
339 were calculated from biological triplicates. **(B) Loss of heterozygosity at the nucleotide level in**  
340 **single isolates obtained by targeting *UTR2* and *FIR1* in IMX1585.** For each targeted locus  
341 (indicated by scissors), the frequency of LOH is shown for 10 isolates with intact fluorescence  
342 (dashed line, IMX1606-IMX1615 and IMX1626-IMX1635) and 10 isolates having lost a fluorophore  
343 (continuous line, IMX1596-IMX1605 and IMX1616-IMX1625). **(C) Overview of loss of**  
344 **heterozygosity across chromosome V in isolates in which *UTR2* and *FIR1* were targeted using**  
345 **Cas9.** The non-targeted strain (IMX1585), *UTR2*-targeted isolates with fluorescence of mRuby2 and  
346 mTurquoise2 (IMX1606-IMX1615), *UTR2*-targeted isolates which lost mRuby2 fluorescence  
347 (IMX1596-IMX1605), *FIR1*-targeted isolates with fluorescence of mRuby2 and mTurquoise2  
348 (IMX1626-IMX1635) and *FIR1*-targeted cells which lost mTurquoise2 fluorescence (IMX1616-  
349 IMX1625) were sequenced using 150 bp paired-end reads and mapped against the CEN.PK113-7D  
350 genome. The fluorophores mRuby2 and mTurquoise2, the targeted genes *UTR2* and *FIR1* and the  
351 centromere are shown at their exact coordinates, but their size is not at scale. Loss of heterozygosity  
352 was defined as regions in which nucleotides which were heterozygous in IMX1585 were no longer  
353 heterozygous in the isolate (in red). Exact coordinates are provided in Table S2.

#### 354 **Identification of repair patterns corresponding to homology-directed repair**

355 We conclude that introduction of a DSB at a heterozygous locus results in low gene-editing  
356 efficiencies due to a competing repair mechanism that causes local or chromosome-arm LOH. While  
357 repair using homologous chromosomes typically relies on BIR, HR or HDR in eukaryotes (29), the  
358 observed local LOH is consistent with HDR (Fig. 4A) (10-12). Indeed, strains IMX1606, IMX1608 and  
359 IMX1613 showed patterns of alternating homozygous and heterozygous sequences around the  
360 targeted locus consistent with the heteroduplex resolution step characteristic for HDR (Fig. 4A and  
361 Table S2). Although previous studies attributed chromosome-arm LOH to BIR or HR (9,26),  
362 occurrence of similar mosaic structures in strains with chromosome-arm LOH (strains IMX1605 and  
363 IMX1619, Table S2) indicated that HDR was also responsible for chromosome-arm LOH. While BIR

364 or HR do not cause mosaic LOH, chromosome-arm LOH is not a commonly-recognized result of HDR  
 365 (Fig. 4A) (10-12). However, we propose a repair mechanism that involves HDR of one of the targeted  
 366 chromatids at the 2n stage of the cell cycle (Fig. 4B), which is consistent with all phenotypes and  
 367 genotypes encountered in this study as well as in previous studies involving hemizygous introduction  
 368 of DSBs (9,26,27,30).

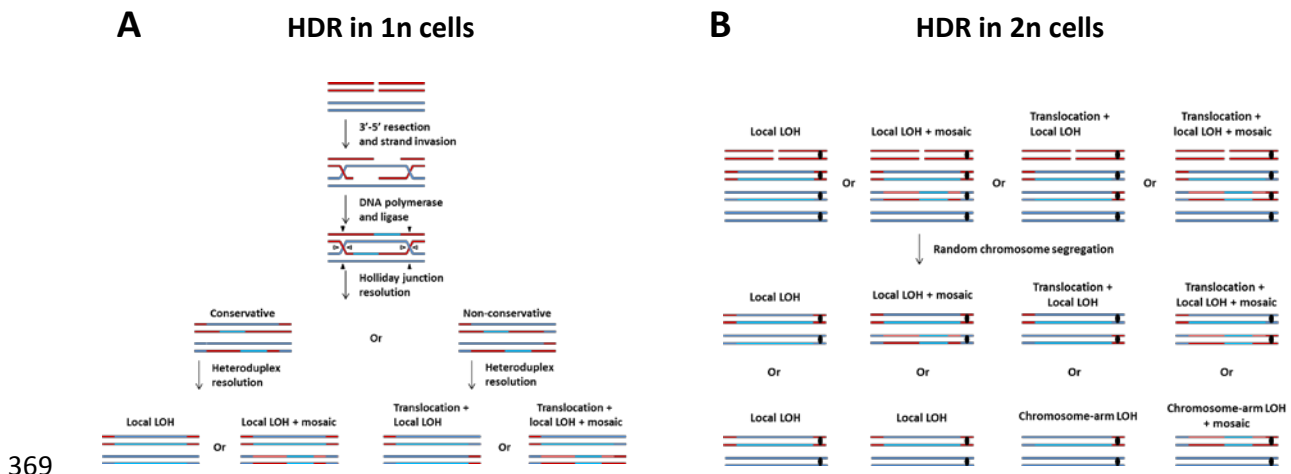

370 **Figure 4. Proposed mechanism for Cas9-mediated loss of heterozygosity based on homology-directed repair**  
 371 **(HDR) between homologous chromosomes. (A) Possible outcomes of HDR in cells with one chromosome**  
 372 **complement (1n). (B) Possible outcomes of HDR in cells with two chromosome complements (2n).** The  
 373 targeted chromosome (red), its homolog (blue) and the centromere are indicated (black, where relevant).  
 374 Newly synthesized DNA is shown in a lighter shade. During heteroduplex resolution, the strand with the  
 375 targeted NGG PAM sequence is always discarded due to Cas9 activity. For 2n HDR, HDR occurs between one  
 376 chromatid of the targeted and one chromatid of the non-targeted chromosome, as in 1n HDR. The chromatids  
 377 subsequently segregate according to their centromere pairing, with one red and one blue centromere in each  
 378 daughter cell. Cells receiving the unrepaired red chromosome die. As indicated in the figure, HDR in 2n cells  
 379 could yield local as well as chromosome-arm LOH, both with and without mosaic structures.

## 380 DISCUSSION

381 The efficiency of gene editing using Cas9 can decrease by almost two orders of magnitude when  
 382 targeting only one of two homologous chromosomes due to a competing repair mechanism causing  
 383 either local or chromosome-arm scale LOH. Contrarily to previously identified side effects of cas9-  
 384 mediated gene editing, the observed LOH consisted not only of loss of genetic material from the  
 385 targeted chromosome (31), but also of replacement of the affected sequence by an additional copy of  
 386 sequence homologous to the targeted site. While such LOH upon introduction of a hemizygous DSB  
 387 has been observed in the yeasts *S. cerevisiae* and *Candida albicans* (9,26), this study demonstrates  
 388 that repair by LOH is not only possible, but occurs at rates which impede gene editing approaches  
 389 based on integration of repair fragments. This phenomenon is likely to contribute to a lesser genome  
 390 accessibility of heterozygous yeasts relative to laboratory strains, which tend to be haploid or

391 homozygous. Therefore, these results are likely to affect the genome editing of hybrids, industrial  
392 yeasts and natural isolates due to their frequent heterozygosity (32), and should be used to update  
393 guidelines for designing gene editing strategies. We strongly recommend to design gRNAs targeting  
394 homozygous nucleotides stretches when targeting heterozygous genomes. When allele-specific gene  
395 editing is required, we recommend the use of repair fragments with integration markers such as the  
396 Venus fluorophore in this study, since accurate gene editing is not impossible, simply inefficient.  
397 When the use of a marker is not permissible, extensive screening of transformants for correct gene  
398 editing may be required.

399 While the HDR machinery is well conserved in eukaryotes (11,12), further research is  
400 required to determine if LOH occurs at similar rates in eukaryotes other than *S. cerevisiae*, and if it  
401 impedes gene editing. While DSB-mediated LOH was observed in *S. cerevisiae*, *C. albicans*,  
402 *Drosophila melanogaster* and *Mus musculus* (9,26,27,30), relative contributions of HR, HDR and  
403 NHEJ to DSB repair vary across species. However, since integration of a repair fragment and repair  
404 by LOH both involve HDR (33,34), targeting heterozygous loci likely causes gene-editing efficiencies  
405 and off-target mutations in other eukaryotes as well, regardless of the efficiency of NHEJ and HR.

406 Targeting of heterozygous loci is common in gene editing, for example during allele  
407 propagation of gene drives and disease allele correction in human gene therapy (33,34). Although  
408 gene drives are based on LOH by HDR (34), the extent of LOH beyond the targeted locus has not  
409 been systematically studied but could, by analogy with the present study, potentially affect entire  
410 chromosome arms. Allele-specific gene editing generally aims at repair by HDR using a co-  
411 transformed repair fragment instead of a homologous chromosome. Reports of LOH after targeting a  
412 heterozygous allele in human embryos despite availability of an adequate repair fragment, are  
413 consistent with Cas9-induced LOH extending beyond the targeted locus, as described here (33).  
414 While, in the human-embryo study, repair by LOH was perceived as a success, the reported role of  
415 LOH in cancer development (35) indicates that large-scale LOH can have important phenotypic  
416 repercussions. Therefore we recommend avoiding allele-specific gene editing when possible until  
417 further research determines if it is a risk in other eukaryotes. Based on the proposed HDR mechanism  
418 for CRISPR/Cas9-mediated LOH (Fig. 4B), the risk of LOH can be mitigated by designing gRNAs that  
419 cut all alleles of heterozygous loci, even if only a single allele needs to be edited. Eventually,  
420 CRISPR-Cas9 editing could become safer by favouring DSB-independent gene-editing methods such  
421 as guided nickases and base-editing strategies for preventing or reducing the incidence of LOH (36-  
422 39).

#### 423 **ACCESSION NUMBERS**

424 The sequencing data were deposited at NCBI (<https://www.ncbi.nlm.nih.gov/>) under the Bioproject  
425 PRJNA471787.

#### 426 **SUPPLEMENTARY DATA**

427 Supplementary Data are available at NAR online.

## 428 **ACKNOWLEDGEMENT**

429 ARGdV conceived the study and designed the experiments. ARGdV and LGFC performed plasmid and  
430 strain construction. ARGdV, LGFC, PdITC and JtH performed the experimental work. ARGdV and  
431 MvdB performed bioinformatics analysis. ARGdV, JTP and JMGD supervised the study and wrote the  
432 manuscript. All authors read and approved the final manuscript.

433 We thank Liset Jansen for drawing our attention to the difficulty to edit a heterozygous gene, Robert  
434 Mans for his expertise with gene editing in *Saccharomyces cerevisiae*, Melanie Wijsman for  
435 constructing and Pascale Daran-Lapujade for sharing plasmids pUDE480, pUDE481 and pUDE482,  
436 Sai T. Reddy for his insights in the potential impact for human gene therapy and Nick Brouwers, Alex  
437 Salazar, Xavier D. V. Hakkaart, Ioannis Papapetridis, Niels G.A. Kuijpers, Jan-Maarten Geertman and  
438 Thomas Abeel for their critical input.

## 439 **FUNDING**

440 This work was supported by the BE-Basic R&D Program (<http://www.be-basic.org/>), which was  
441 granted an FES subsidy from the Dutch Ministry of Economic Affairs, Agriculture and Innovation  
442 (EL&I).

## 443 **CONFLICT OF INTEREST**

444 The authors declare no conflict of interest.

## 445 **REFERENCES**

- 446 1. Sander, J.D. and Joung, J.K. (2014) CRISPR-Cas systems for editing, regulating and targeting  
447 genomes. *Nat. Biotechnol.*, **32**, 347.
- 448 2. Mali, P., Yang, L., Esvelt, K.M., Aach, J., Guell, M., DiCarlo, J.E., Norville, J.E. and Church, G.M.  
449 (2013) RNA-guided human genome engineering via Cas9. *Science*, **339**, 823-826.
- 450 3. Mans, R., van Rossum, H.M., Wijsman, M., Backx, A., Kuijpers, N.G., van den Broek, M.,  
451 Daran-Lapujade, P., Pronk, J.T., van Maris, A.J. and Daran, J.-M.G. (2015) CRISPR/Cas9: a  
452 molecular Swiss army knife for simultaneous introduction of multiple genetic modifications  
453 in *Saccharomyces cerevisiae*. *FEMS Yeast Res.*, **15**.
- 454 4. DiCarlo, J.E., Norville, J.E., Mali, P., Rios, X., Aach, J. and Church, G.M. (2013) Genome  
455 engineering in *Saccharomyces cerevisiae* using CRISPR-Cas systems. *Nucleic Acids Res.*, **41**,  
456 4336-4343.
- 457 5. Klein, M., Eslami-Mossallam, B., Arroyo, D.G. and Depken, M. (2018) Hybridization Kinetics  
458 Explains CRISPR-Cas Off-Targeting Rules. *Cell Rep.*, **22**, 1413-1423.
- 459 6. Jasin, M. and Rothstein, R. (2013) Repair of strand breaks by homologous recombination.  
460 *Cold Spring Harb. Perspect. Biol.*, **5**, a012740.
- 461 7. Kuijpers, N.G., Solis-Escalante, D., Luttik, M.A., Bisschops, M.M., Boonekamp, F.J., van den  
462 Broek, M., Pronk, J.T., Daran, J.-M. and Daran-Lapujade, P. (2016) Pathway swapping:  
463 Toward modular engineering of essential cellular processes. *Proc. Natl. Acad. Sci. U S A.*, **113**,  
464 15060-15065.



- 465 8. Gorter de Vries, A.R., de Groot, P.A., van den Broek, M. and Daran, J.-M.G. (2017) CRISPR-  
466 Cas9 mediated gene deletions in lager yeast *Saccharomyces pastorianus*. *Microb. Cell. Fact.*,  
467 **16**, 222.
- 468 9. Sadhu, M.J., Bloom, J.S., Day, L. and Kruglyak, L. (2016) CRISPR-directed mitotic  
469 recombination enables genetic mapping without crosses. *Science*, **352**, 1113-1116.
- 470 10. Li, X. and Heyer, W.-D. (2008) Homologous recombination in DNA repair and DNA damage  
471 tolerance. *Cell Res.*, **18**, 99.
- 472 11. Haber, J.E. (2000) Partners and pathways: repairing a double-strand break. *Trends Genet.*, **16**,  
473 259-264.
- 474 12. Moynahan, M.E., Chiu, J.W., Koller, B.H. and Jasin, M. (1999) Brca1 controls homology-  
475 directed DNA repair. *Mol. Cell*, **4**, 511-518.
- 476 13. Salazar, A.N., Gorter de Vries, A.R., van den Broek, M., Wijsman, M., de la Torre Cortés, P.,  
477 Brickwedde, A., Brouwers, N., Daran, J.-M.G. and Abeel, T. (2017) Nanopore sequencing  
478 enables near-complete de novo assembly of *Saccharomyces cerevisiae* reference strain CEN.  
479 PK113-7D. *FEMS Yeast Res.*, **17**.
- 480 14. Goffeau, A., Barrell, B.G., Bussey, H., Davis, R., Dujon, B., Feldmann, H., Galibert, F., Hoheisel,  
481 J., Jacq, C. and Johnston, M. (1996) Life with 6000 genes. *Science*, **274**, 546-567.
- 482 15. Verduyn, C., Postma, E., Scheffers, W.A. and van Dijken, J.P. (1990) Physiology of  
483 *Saccharomyces Cerevisiae* in anaerobic glucose-limited chemostat cultures. *J. Gen. Microbiol.*,  
484 **136**, 395-403.
- 485 16. Pronk, J.T. (2002) Auxotrophic yeast strains in fundamental and applied research. *Appl.*  
486 *Environ. Microbiol.*, **68**, 2095-2100.
- 487 17. Solis-Escalante, D., Kuijpers, N.G., Nadine, B., Bolat, I., Bosman, L., Pronk, J.T., Daran, J.-M.  
488 and Pascale, D.-L. (2013) amdSYM, a new dominant recyclable marker cassette for  
489 *Saccharomyces cerevisiae*. *FEMS Yeast Res.*, **13**, 126-139.
- 490 18. Lee, M.E., DeLoache, W.C., Cervantes, B. and Dueber, J.E. (2015) A highly characterized yeast  
491 toolkit for modular, multipart assembly. *ACS Synth. Biol.*, **4**, 975-986.
- 492 19. Gietz, R.D. and Woods, R.A. (2002), *Methods in enzymology*. Elsevier, Vol. 350, pp. 87-96.
- 493 20. Li, H. and Durbin, R. (2010) Fast and accurate long-read alignment with Burrows–Wheeler  
494 transform. *Bioinformatics*, **26**, 589-595.
- 495 21. Li, H., Handsaker, B., Wysoker, A., Fennell, T., Ruan, J., Homer, N., Marth, G., Abecasis, G.  
496 and Durbin, R. (2009) The sequence alignment/map format and SAMtools. *Bioinformatics*, **25**,  
497 2078-2079.
- 498 22. Walker, B.J., Abeel, T., Shea, T., Priest, M., Abouelliel, A., Sakthikumar, S., Cuomo, C.A., Zeng,  
499 Q., Wortman, J. and Young, S.K. (2014) Pilon: an integrated tool for comprehensive microbial  
500 variant detection and genome assembly improvement. *PLoS one*, **9**, e112963.
- 501 23. Robinson, J.T., Thorvaldsdóttir, H., Winckler, W., Guttman, M., Lander, E.S., Getz, G. and  
502 Mesirov, J.P. (2011) Integrative genomics viewer. *Nat. Biotechnol.*, **29**, 24.
- 503 24. Brickwedde, A., Brouwers, N., van den Broek, M., Gallego Murillo, J.S., Fraiture, J.L., Pronk,  
504 J.T. and Daran, J.-M.G. (2018) Structural, physiological and regulatory analysis of maltose  
505 transporter genes in *Saccharomyces eubayanus* CBS 12357<sup>T</sup>. *Front Microbiol.*, **9**, 1786.
- 506 25. Hebly, M., Brickwedde, A., Bolat, I., Driessen, M.R.M., de Hulster, E.A.F., van den Broek, M.,  
507 Pronk, J.T., Geertman, J.-M., Daran, J.-M.G. and Daran-Lapujade, P. (2015) *S. cerevisiae* × *S.*  
508 *eubayanus* interspecific hybrid, the best of both worlds and beyond. *FEMS Yeast Res.*, **15**.
- 509 26. Feri, A., Loll-Krippléber, R., Commere, P.-H., Maufrais, C., Sertour, N., Schwartz, K., Sherlock,  
510 G., Bougnoux, M.-E., d'Enfert, C. and Legrand, M. (2016) Analysis of repair mechanisms  
511 following an induced double-strand break uncovers recessive deleterious alleles in the  
512 *Candida albicans* diploid genome. *MBio*, **7**, e01109-01116.

- 513 27. Heinze, S.D., Kohlbrenner, T., Ippolito, D., Meccariello, A., Burger, A., Mosimann, C., Saccone,  
514 G. and Bopp, D. (2017) CRISPR-Cas9 targeted disruption of the yellow ortholog in the  
515 housefly identifies the brown body locus. *Sci. Rep.*, **7**, 4582.
- 516 28. Chu, V.T., Weber, T., Wefers, B., Wurst, W., Sander, S., Rajewsky, K. and Kühn, R. (2015)  
517 Increasing the efficiency of homology-directed repair for CRISPR-Cas9-induced precise gene  
518 editing in mammalian cells. *Nat. Biotechnol.*, **33**, 543.
- 519 29. Jasin, M. and Haber, J.E. (2016) The democratization of gene editing: Insights from site-  
520 specific cleavage and double-strand break repair. *DNA repair*, **44**, 6-16.
- 521 30. Henson, V., Palmer, L., Banks, S., Nadeau, J.H. and Carlson, G.A. (1991) Loss of  
522 heterozygosity and mitotic linkage maps in the mouse. *Proc. Natl. Acad. Sci. USA*, **88**, 6486-  
523 6490.
- 524 31. Kosicki, M., Tomberg, K. and Bradley, A. (2018) Repair of double-strand breaks induced by  
525 CRISPR-Cas9 leads to large deletions and complex rearrangements. *Nature biotechnology*.
- 526 32. Gorter de Vries, A.R., Pronk, J.T. and Daran, J.-M.G. (2017) Industrial relevance of  
527 chromosomal copy number variation in *Saccharomyces* yeasts. *Appl. Environ. Microbiol.*, **83**,  
528 e03206-03216.
- 529 33. Ma, H., Marti-Gutierrez, N., Park, S.-W., Wu, J., Lee, Y., Suzuki, K., Koski, A., Ji, D., Hayama, T.  
530 and Ahmed, R. (2017) Correction of a pathogenic gene mutation in human embryos. *Nature*,  
531 **548**, 413-419.
- 532 34. Champer, J., Buchman, A. and Akbari, O.S. (2016) Cheating evolution: engineering gene  
533 drives to manipulate the fate of wild populations. *Nat. Rev. Genet.*, **17**, 146.
- 534 35. Naylor, S.L., Johnson, B.E., Minna, J.D. and Sakaguchi, A.Y. (1987) Loss of heterozygosity of  
535 chromosome 3p markers in small-cell lung cancer. *Nature*, **329**, 451.
- 536 36. Kim, K., Ryu, S.-M., Kim, S.-T., Baek, G., Kim, D., Lim, K., Chung, E., Kim, S. and Kim, J.-S. (2017)  
537 Highly efficient RNA-guided base editing in mouse embryos. *Nat. Biotechnol.*, **35**, 435.
- 538 37. Komor, A.C., Kim, Y.B., Packer, M.S., Zuris, J.A. and Liu, D.R. (2016) Programmable editing of  
539 a target base in genomic DNA without double-stranded DNA cleavage. *Nature*, **533**, 420.
- 540 38. Shen, B., Zhang, W., Zhang, J., Zhou, J., Wang, J., Chen, L., Wang, L., Hodgkins, A., Iyer, V. and  
541 Huang, X. (2014) Efficient genome modification by CRISPR-Cas9 nickase with minimal off-  
542 target effects. *Nat. Methods*, **11**, 399.
- 543 39. Ran, F.A., Hsu, P.D., Lin, C.-Y., Gootenberg, J.S., Konermann, S., Trevino, A.E., Scott, D.A.,  
544 Inoue, A., Matoba, S. and Zhang, Y. (2013) Double nicking by RNA-guided CRISPR Cas9 for  
545 enhanced genome editing specificity. *Cell*, **154**, 1380-1389.
